# Supplementary material for: A computational study of CO oxidation reactions on metal impurities in graphene divacancies
Source: Royal Society of Chemistry journal article supplement (doi:10.1039/c7cp07397f), 2017-12-15
Supplement: c7cp07397f1.pdf [file c7cp07397f1.pdf]

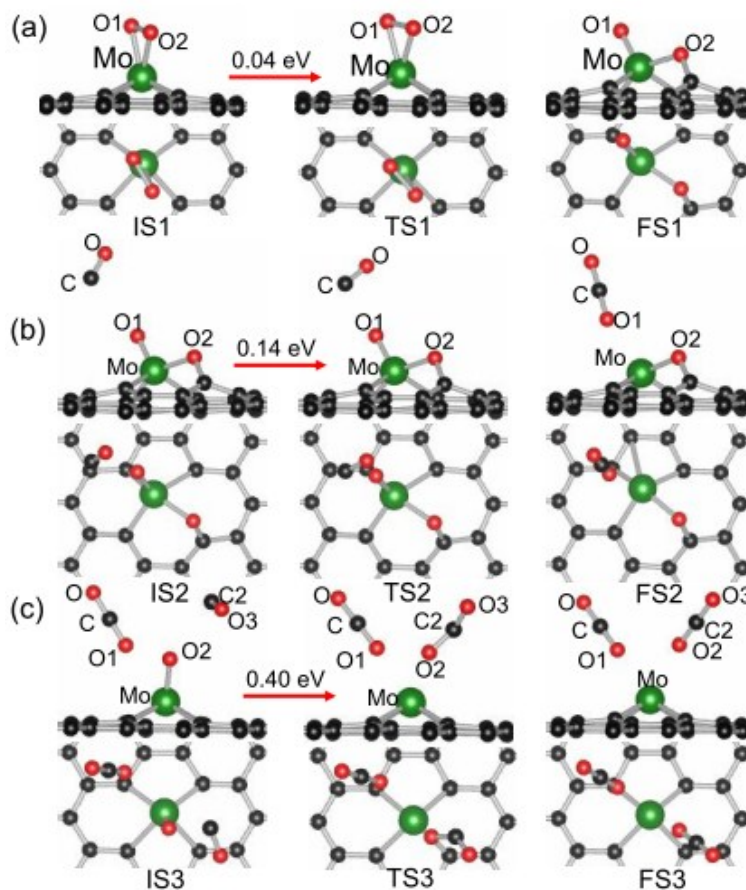

**Fig.S1.** The minimum energy profiles and the configurations of different states for CO oxidation reaction on Mo-DG sheet, including (a) the dissociative adsorption of O<sub>2</sub> molecule and (b)-(c) 2CO + 2O<sub>ads</sub> reactions by the ER mechanism. Red, green and black balls represent O, Mo and C atoms, respectively.

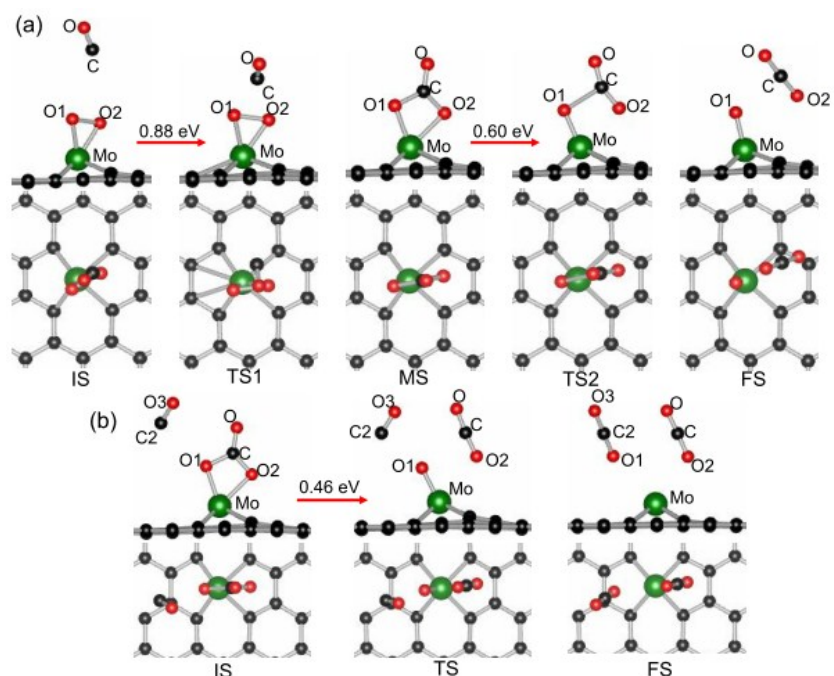

**Fig.S2.** The minimum energy profiles and the configurations of different states for CO oxidation reaction on Mo-DG sheet, including (a)  $\text{CO} + \text{O}_2 \rightarrow \text{CO}_3 \rightarrow \text{CO}_2 + \text{O}_{\text{ads}}$  and (b)  $\text{CO}_3 + \text{CO} \rightarrow 2\text{CO}_2$  reactions by the ER mechanism. Red, green and black balls represent O, Mo and C atoms, respectively.

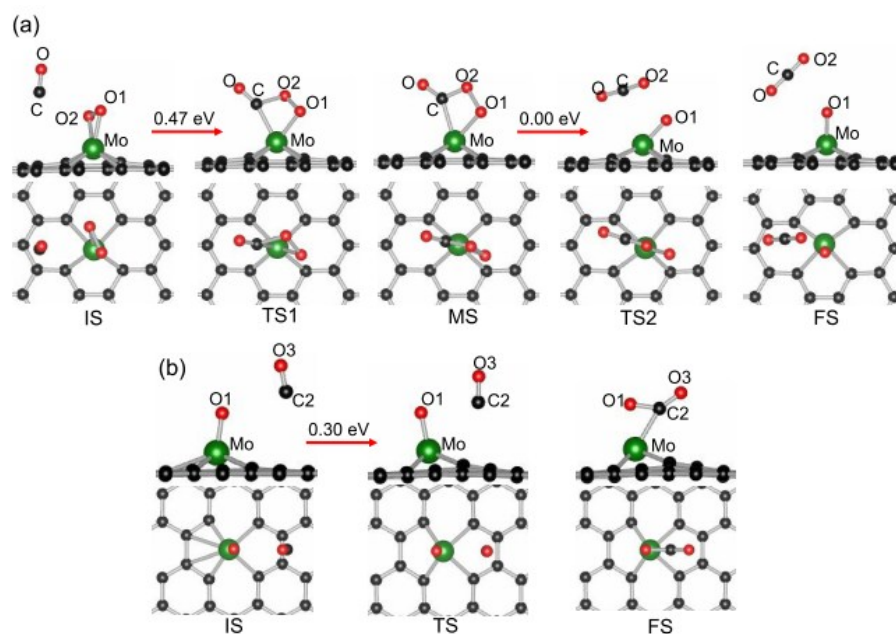

**Fig.S3.** The minimum energy profiles and the configurations of different states for CO oxidation reaction on Mo-DG sheet, including (a)  $\text{CO} + \text{O}_2 \rightarrow \text{OOCO} \rightarrow \text{CO}_2 + \text{O}_{\text{ads}}$  by the LH mechanism, (b)  $\text{CO} + \text{O}_{\text{ads}}$  reaction by the ER mechanism. Red, Green and black balls represent O, Mo and C atoms, respectively.

**Table S1.** Adsorption energies ( $E_{\text{ads}}$ , eV) of different adsorbates (including the reactants, intermediates and products) on Co-DG sheet are calculated by GGA-PBE and DFT-D2 methods.

| adsorbates | CO   | O <sub>2</sub> | O    | CO <sub>2</sub> | CO <sub>3</sub> | CO, O <sub>2</sub> | 2OCO |
|------------|------|----------------|------|-----------------|-----------------|--------------------|------|
| GGA-PBE    | 1.32 | 1.61           | 4.83 | 0.16            | 4.56            | 1.79               | 0.33 |
| DFT-D2     | 1.47 | 1.74           | 4.91 | 0.27            | 4.81            | 2.09               | 0.85 |

**Table.S2.** Structural parameters for the CO oxidation on the Mo-DG (IS, TS and FS), (a) the dissociated reaction of O<sub>2</sub> (O<sub>2</sub> → O1 + O2), two CO reacting with O<sub>ads</sub> including (b) CO + O1 → CO<sub>2</sub> and (c) CO + O2 → CO<sub>2</sub>, as display in Fig. S1(a)-(c).

| O <sub>2</sub> → O1 + O2  | IS1 (Å) | TS1 (Å) | FS1 (Å) |
|---------------------------|---------|---------|---------|
| (a)                       |         |         |         |
| d <sub>O1-O2</sub>        | 1.44    | 1.45    | 3.04    |
| d <sub>Mo-O1</sub>        | 1.94    | 1.95    | 1.71    |
| d <sub>Mo-O2</sub>        | 1.98    | 1.96    | 1.94    |
| O1 + CO → CO <sub>2</sub> | IS2 (Å) | TS2 (Å) | FS2 (Å) |
| (b)                       |         |         |         |
| d <sub>O1-O2</sub>        | 3.02    | 3.03    | 3.54    |
| d <sub>O1-Mo</sub>        | 1.72    | 1.71    | 2.48    |
| d <sub>C-O</sub>          | 1.14    | 1.14    | 1.17    |
| d <sub>C-O1</sub>         | 2.89    | 2.34    | 1.18    |
| O2 + CO → CO <sub>2</sub> | IS3 (Å) | TS3 (Å) | FS3 (Å) |
| (c)                       |         |         |         |
| d <sub>O2-Mo</sub>        | 1.73    | 2.06    | 2.46    |
| d <sub>O2-C2</sub>        | 2.69    | 1.23    | 1.18    |
| d <sub>C2-O3</sub>        | 1.14    | 1.18    | 1.17    |

**Table.S3.** Structural parameters for the preadsorbed O<sub>2</sub> with CO for the IS, TS, MS and FS along the MEP for CO oxidation on the Mo-DG sheet through ER reactions, which includes (a) CO + O<sub>2</sub> → CO<sub>3</sub> → CO<sub>2</sub> + O<sub>ads</sub> and (b) CO + CO<sub>3</sub> → 2CO<sub>2</sub>, the corresponding reaction pathways are display in Fig. S2(a) and (b).

| distance<br>(Å)    | IS   | TS1  | MS   | TS2  | FS   |
|--------------------|------|------|------|------|------|
| (a)                |      |      |      |      |      |
| d <sub>C-O</sub>   | 1.14 | 1.15 | 1.21 | 1.18 | 1.17 |
| d <sub>C-O1</sub>  | 3.47 | 2.22 | 1.39 | 1.95 | 2.72 |
| d <sub>C-O2</sub>  | 3.49 | 2.12 | 1.33 | 1.22 | 1.18 |
| d <sub>O1-Mo</sub> | 1.94 | 1.90 | 1.96 | 1.80 | 1.73 |
| d <sub>O2-Mo</sub> | 1.98 | 1.97 | 2.11 | 2.46 | 3.53 |
| d <sub>O1-O2</sub> | 1.44 | 1.51 | 2.18 | 2.41 | 3.02 |
| (b)                |      |      |      |      |      |
| distance (Å)       | IS   | TS   | FS   |      |      |
| d <sub>O3-C2</sub> | 1.14 | 1.15 | 1.17 |      |      |
| d <sub>O1-C</sub>  | 1.39 | 2.58 | 3.19 |      |      |
| d <sub>O1-C2</sub> | 2.98 | 2.50 | 1.18 |      |      |
| d <sub>O1-Mo</sub> | 1.96 | 1.74 | 2.99 |      |      |

**Table.S4.** Structural parameters for the coadsorption of CO and O<sub>2</sub> for the IS, TS, MS and FS along the MEP for CO oxidation on the Mo-DG, (a) LH reaction (CO + O<sub>2</sub> → OOCO → CO<sub>2</sub> + O<sub>ads</sub>), (b) ER reaction (CO + O → CO<sub>2</sub>), as display in Fig. S3(a)-(b).

| distance<br>(Å)    | IS   | TS1  | MS   | TS2  | FS   |
|--------------------|------|------|------|------|------|
| (a)                |      |      |      |      |      |
| d <sub>C-O</sub>   | 1.14 | 1.19 | 1.21 | 1.18 | 1.17 |
| d <sub>C-Mo</sub>  | 3.92 | 2.20 | 2.21 | 2.99 | 4.16 |
| d <sub>C-O1</sub>  | 3.23 | 2.30 | 2.18 | 2.79 | 2.91 |
| d <sub>C-O2</sub>  | 2.99 | 1.56 | 1.38 | 1.16 | 1.17 |
| d <sub>O1-Mo</sub> | 1.94 | 2.00 | 2.03 | 1.76 | 1.72 |
| d <sub>O2-Mo</sub> | 2.00 | 2.20 | 2.74 | 3.13 | 4.63 |
| d <sub>O1-O2</sub> | 1.44 | 1.45 | 1.48 | 2.24 | 3.13 |
| (b)                |      |      |      |      |      |
| distance (Å)       | IS   | TS   | FS   |      |      |
| d <sub>O1-Mo</sub> | 1.72 | 1.74 | 2.03 |      |      |
| d <sub>O1-C2</sub> | 2.91 | 2.61 | 1.32 |      |      |
| d <sub>C2-O3</sub> | 1.14 | 1.15 | 1.20 |      |      |
